# Supplementary material for: Volumetric properties of aqueous binary mixtures of 2-diethylaminoethanol from 283.15 to 303.15 K
Source: Royal Society of Chemistry journal article supplement (doi:10.1039/b004348f), 2000-01-01
Supplement: table.doc [file table.doc]

# Supplementary Data

Experimental density values for the binary system DEEA/Water from 283.15 to 303.15 K.

| *x*2 | *d* / kg m-3 | | | | |
| --- | --- | --- | --- | --- | --- |
| 283.15 K | 288.15 K | 293.15 K | 298.15 K | 303.15 K |
|  |  |  |  |  |  |
| 0.00000 | 999.699 | 999.097 | 998.201 | 997.041 | 995.643 |
| 0.00053 | 999.803 | 999.051 | 998.195 | 997.032 | 995.596 |
| 0.00104 | 999.782 | 998.970 | 998.151 | 996.992 | 995.501 |
| 0.00111 | 999.771 | 998.962 | 998.150 | 996.963 | 995.492 |
| 0.00120 | 999.763 | 998.941 | 998.132 | 996.951 | 995.442 |
| 0.00121 | 999.762 | 998.940 | 998.130 | 996.941 | 995.462 |
| 0.00130 | 999.743 | 998.932 | 998.111 | 996.904 | 995.422 |
| 0.00139 | 999.734 | 998.911 | 998.103 | 996.882 | 995.409 |
| 0.00276 | 999.525 | 998.657 | 997.717 | 996.511 | 995.063 |
| 0.00295 | 999.452 | 998.623 | 997.652 | 996.453 | 995.007 |
| 0.00336 | 999.341 | 998.552 | 997.451 | 996.322 | 994.971 |
| 0.00371 | 999.251 | 998.463 | 997.280 | 996.152 | 994.755 |
| 0.00503 | 999.013 | 998.171 | 996.753 | 995.664 | 994.313 |
| 0.00679 | 998.663 | 997.793 | 996.101 | 994.952 | 993.554 |
| 0.00705 | 998.579 | 997.748 | 996.022 | 994.849 | 993.457 |
| 0.00782 | 998.436 | 997.589 | 995.803 | 994.653 | 993.243 |
| 0.00797 | 998.409 | 997.554 | 995.786 | 994.582 | 993.184 |
| 0.00926 | 998.128 | 997.293 | 995.396 | 994.203 | 992.793 |
| 0.01338 | 997.780 | 996.872 | 995.299 | 994.190 | 992.654 |
| 0.01992 | 997.584 | 996.373 | 994.896 | 993.785 | 992.051 |
| 0.02534 | 997.456 | 996.075 | 994.464 | 993.137 | 991.503 |
| 0.02952 | 997.406 | 995.860 | 994.109 | 992.695 | 991.082 |
| 0.03380 | 997.351 | 995.614 | 993.692 | 992.107 | 990.555 |
| 0.04082 | 997.146 | 995.110 | 992.831 | 991.247 | 989.504 |
| 0.05958 | 995.664 | 993.073 | 990.133 | 987.996 | 985.801 |
| 0.08026 | 992.442 | 989.019 | 985.834 | 984.102 | 978.928 |
| 0.10139 | 986.261 | 983.900 | 980.753 | 977.293 | 974.732 |
| 0.13318 | 982.357 | 978.367 | 974.590 | 973.683 | 966.601 |
| 0.15023 | 979.376 | 975.483 | 971.299 | 970.408 | 963.108 |
| 0.18493 | 972.636 | 968.409 | 964.383 | 964.431 | 955.920 |
| 0.20044 | 967.851 | 964.913 | 961.291 | 958.521 | 955.211 |
| 0.25235 | 959.519 | 956.422 | 952.464 | 949.391 | 945.319 |
| 0.29887 | 952.352 | 948.844 | 945.578 | 942.009 | 938.603 |
| 0.35154 | 945.976 | 942.463 | 938.761 | 935.167 | 931.591 |
| 0.40180 | 939.900 | 935.474 | 931.542 | 927.253 | 922.902 |
| 0.45212 | 934.381 | 929.972 | 926.500 | 922.082 | 917.572 |
| 0.50381 | 927.673 | 923.411 | 918.822 | 914.283 | 910.113 |
| 0.54937 | 923.624 | 918.840 | 915.184 | 910.654 | 906.832 |
| 0.60800 | 917.620 | 913.681 | 909.424 | 905.653 | 901.541 |
| 0.65130 | 913.992 | 909.032 | 905.053 | 900.232 | 896.091 |
| 0.71205 | 909.891 | 905.382 | 900.652 | 896.589 | 892.388 |
| 0.75029 | 906.240 | 901.511 | 897.611 | 893.441 | 889.124 |
| 0.80177 | 902.882 | 898.450 | 894.081 | 889.513 | 885.866 |
| 0.85420 | 899.302 | 894.960 | 890.653 | 886.532 | 882.962 |
| 0.90117 | 896.580 | 892.092 | 888.054 | 884.131 | 879.971 |
| 0.94434 | 895.043 | 890.565 | 886.272 | 881.647 | 877.809 |
| 1.00000 | 894.041 | 888.773 | 884.140 | 879.503 | 875.022 |
|  |  |  |  |  |  |
